# Supplementary material
Source: MDPI journal article supplement (https://www.mdpi.com/2079-6412/9/6/361)
Supplement: s1 [file s1]

# Supplementary Materials: Experimental and Modeling Study of the Fabrication of Mg Nano-Sculpted Films by Magnetron Sputtering Combined with Glancing Angle Deposition

Hui Liang <sup>1,2</sup>, Xi Geng <sup>1</sup>, Wenjiang Li <sup>1,3,\*</sup>, Andriano Panepinto <sup>2</sup>, Damien Thiry <sup>2</sup>, Minfang Chen <sup>1,3,\*</sup> and Rony Snyders <sup>2,4,\*</sup>

<sup>1</sup> School of Materials Science and Engineering, Tianjin University of Technology, Tianjin 300384, China; hui.liang@umons.ac.be (H.L.); xigeng0220@126.com (X.G.)

<sup>2</sup> Chimie des Interactions Plasma-Surface, University of Mons, 20 Place du Parc, B 7000 Mons, Belgium; adriano.panepinto@umons.ac.be (A.P.); Damien.THIRY@umons.ac.be (D.T.)

<sup>3</sup> Key Laboratory of Display Materials and Photoelectric Device (Ministry of Education), Tianjin 300384, China

<sup>4</sup> Materia Nova Research Center, 1 Avenue Nicolas Copernic, B 7000 Mons, Belgium

\* Correspondence: liwj@tjut.edu.cn (W.L.); jgj@tjut.edu.cn (M.C.); rony.snyders@umons.ac.be (R.S.); Tel.: +32-65-554955 (R.S.)

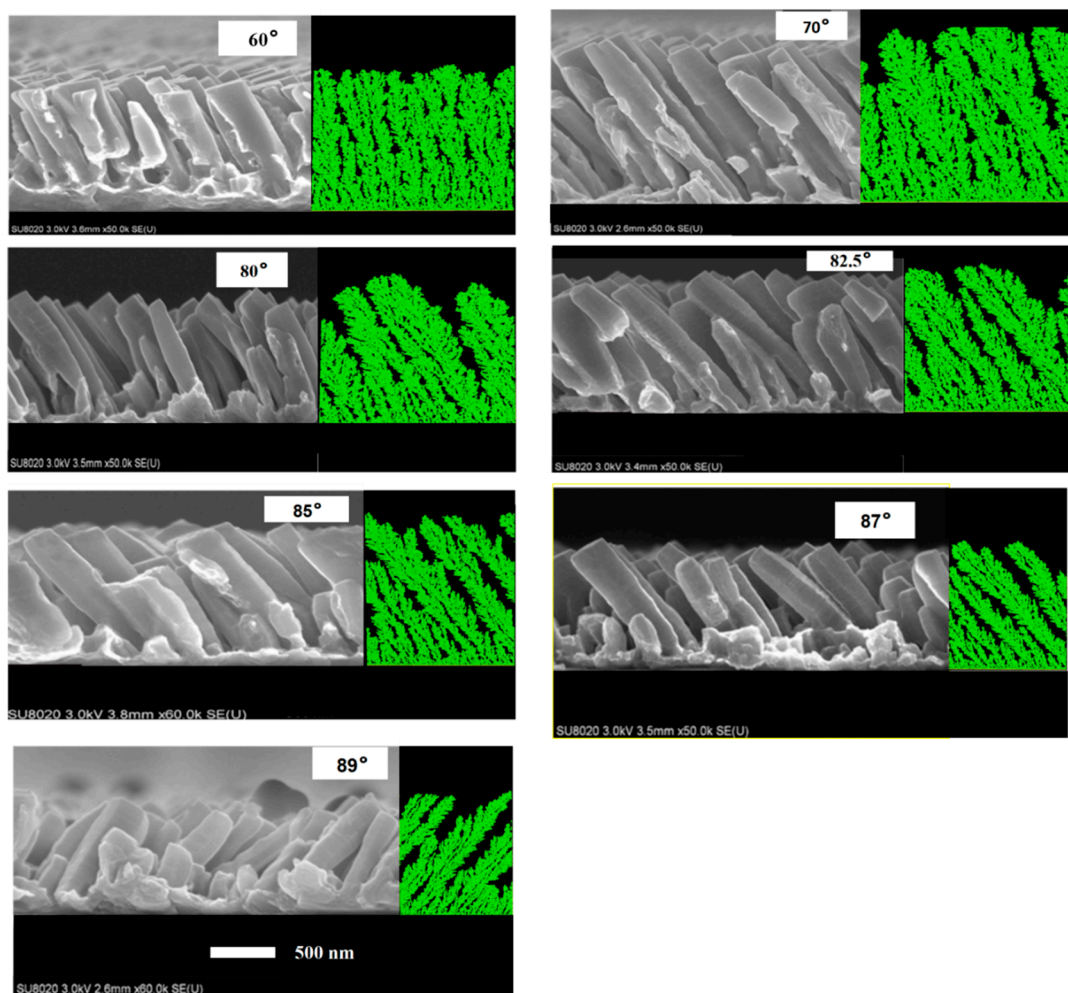

**Figure S1.** SEM cross-section view and of Mg films deposited for  $P_{\text{Tot}} = 0.26$  Pa and varying  $\alpha$  from 60° to 89°. The green images correspond to the structures calculated by using Mkc modeling.

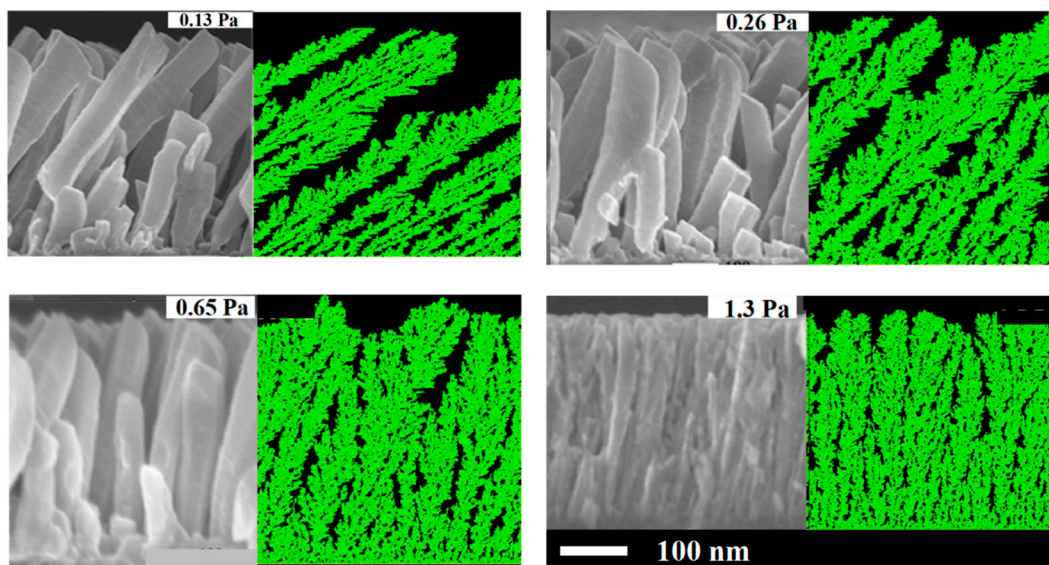

**Figure S2.** SEM cross-section view and of Mg films deposited for  $\alpha = 85^\circ$  and varying  $P_{\text{Tot}}$  from 0.13 Pa to 1.3 Pa. The green images correspond to the structures calculated by using Mkc modeling.

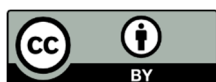

© 2019 by the authors. Licensee MDPI, Basel, Switzerland. This article is an open access article distributed under the terms and conditions of the Creative Commons Attribution (CC BY) license (<http://creativecommons.org/licenses/by/4.0/>).
